# Supplementary material
Source: publisher figshare collection journal article supplement (https://gsajournals.figshare.com/articles/dataset/_/14778540)
Supplement: Supplementary file 2 [file 1]

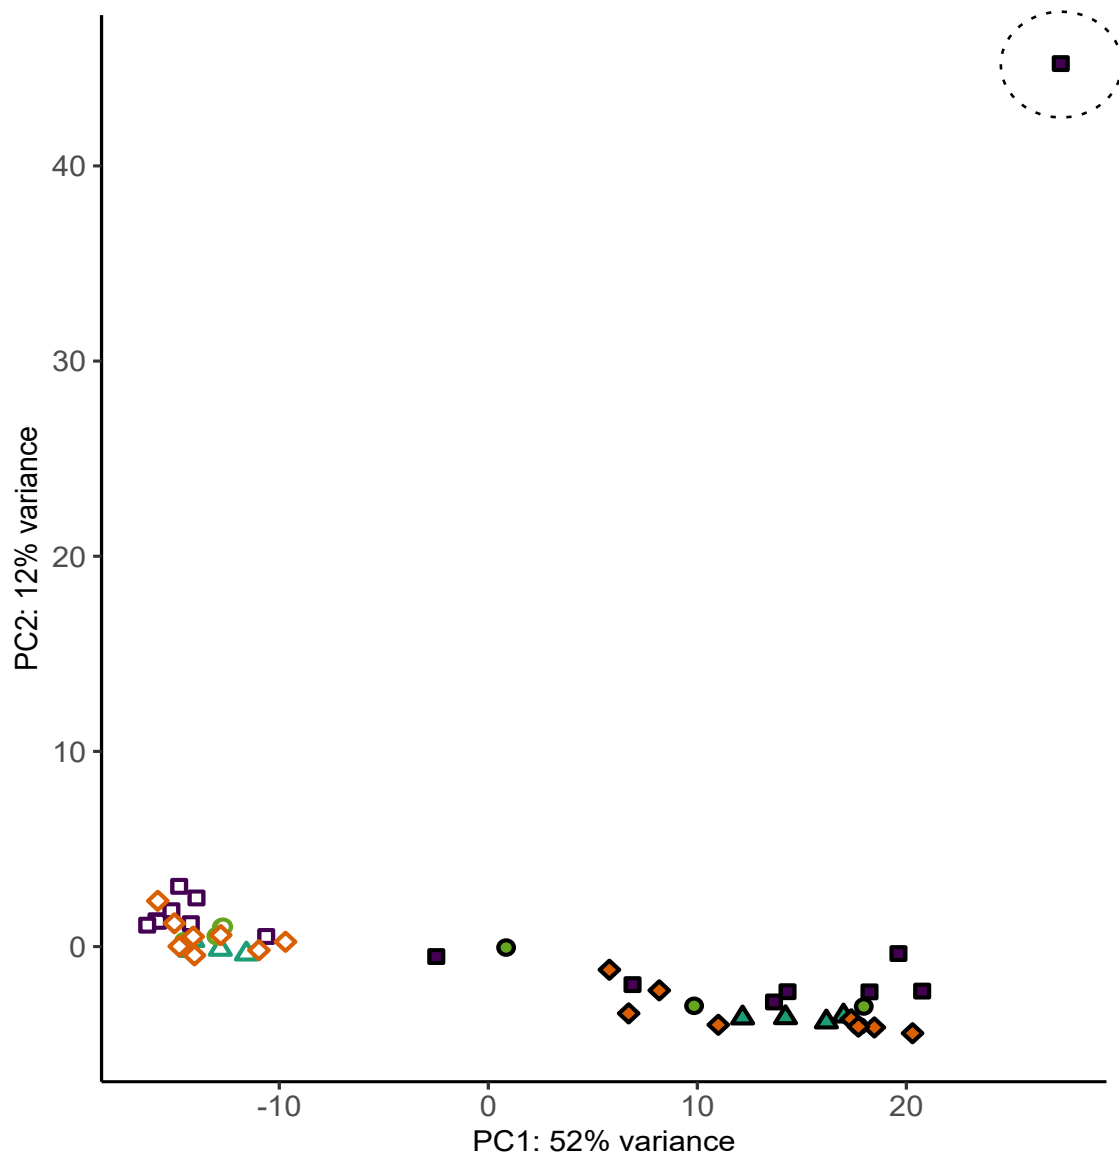

**Figure S1.** Principal Component Analysis of full dataset (48 samples): Munich, Germany (M9 and M12; purple), Nicosia, Cyprus (C2; teal), Kuala Lumpur, Malaysia (KL; green) and Siavonga, Zambia (ZI; orange). Filled (closed) symbols represent stress samples and empty (open) symbols represent control samples. The sample indicated by the dashed outline was identified as outlier and removed from subsequent analyses.

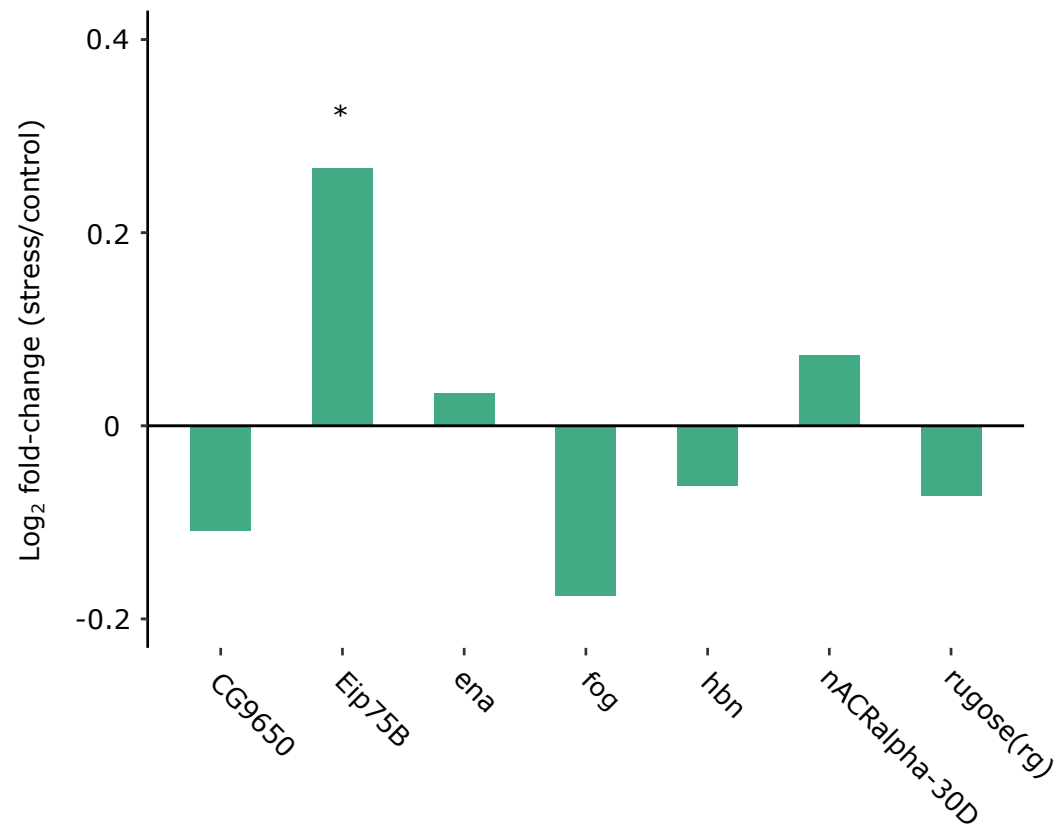

**Figure S2.** MSB-induced Log<sub>2</sub> fold-change (stress/control) of candidate oxidative stress-susceptible genes identified in a genome-wide association (GWA) study by Weber et al. (2012). Asterisk indicates the adjusted *P*-value from a Wald test as applied in DESeq2: \**P* < 0.05.

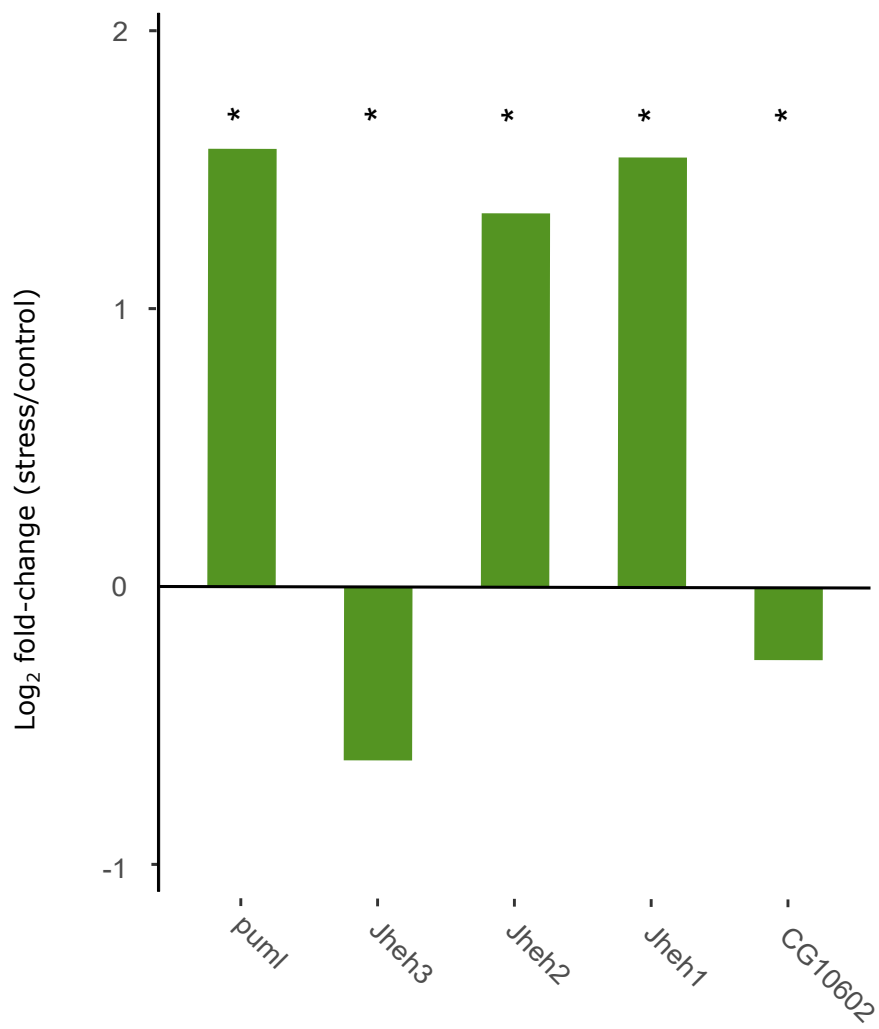

**Figure S3.** MSB-induced Log<sub>2</sub> fold-change (stress/control) of candidates in the epoxide hydrolase gene family. Asterisk indicates the adjusted *P*-value from a Wald test as applied in DESeq2: \**P* < 0.05.

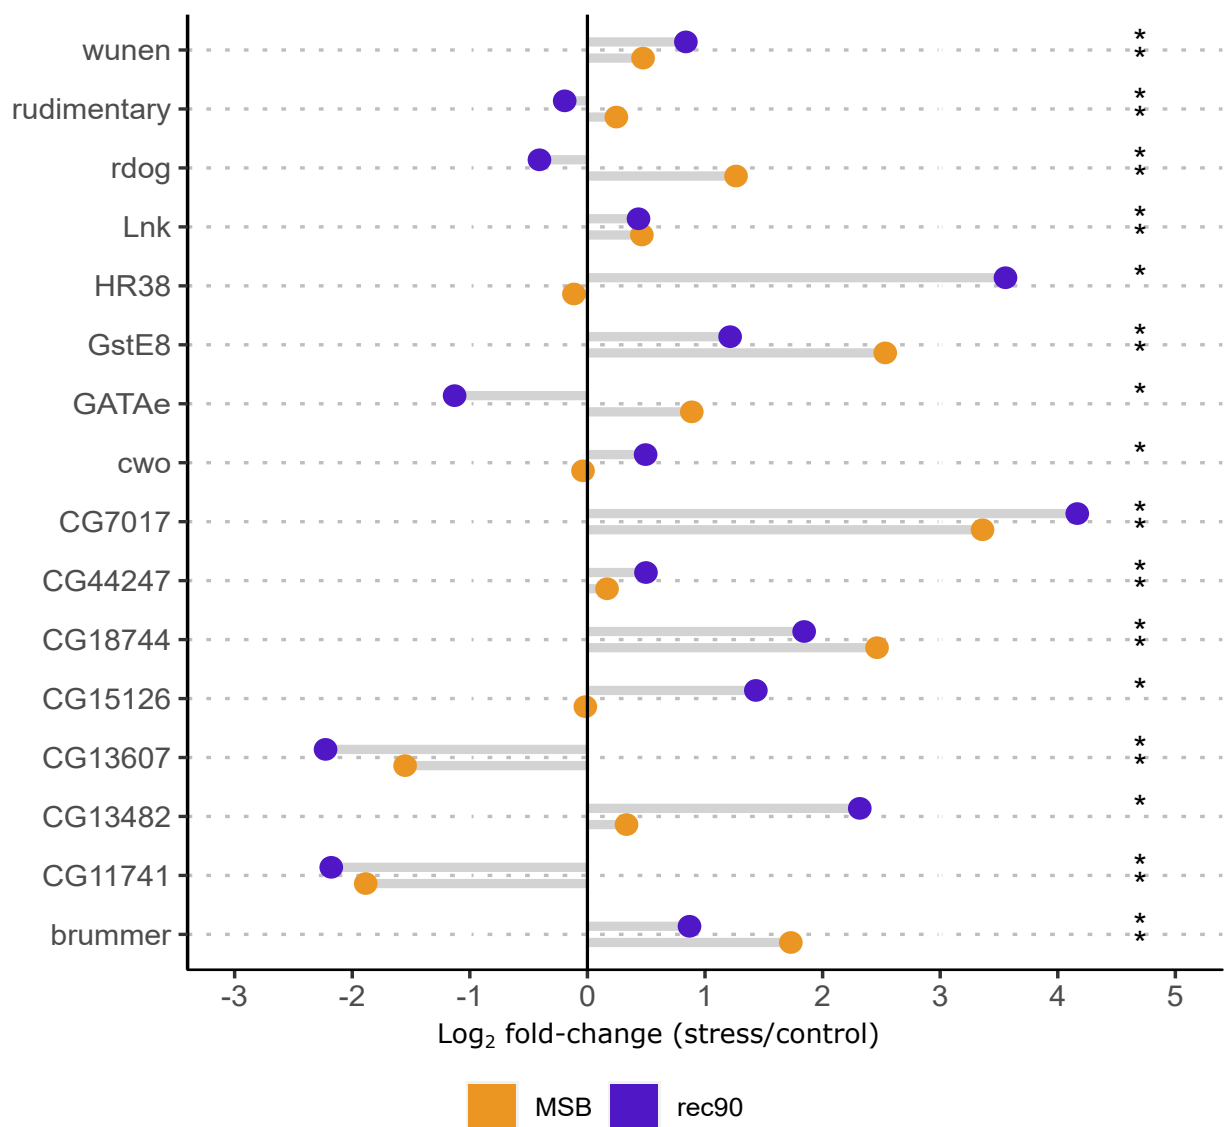

**Figure S4.** Comparisons of log<sub>2</sub> fold-change (stress/control) in MSB oxidative stress (orange) and cold shock (von Heckel et al. 2016) (purple) of genes reported to have significant genotype environment interaction according to von Heckel et al. (2016). Asterisk indicates the adjusted *P*-value from a Wald test as applied in DESeq2: \**P* < 0.05.

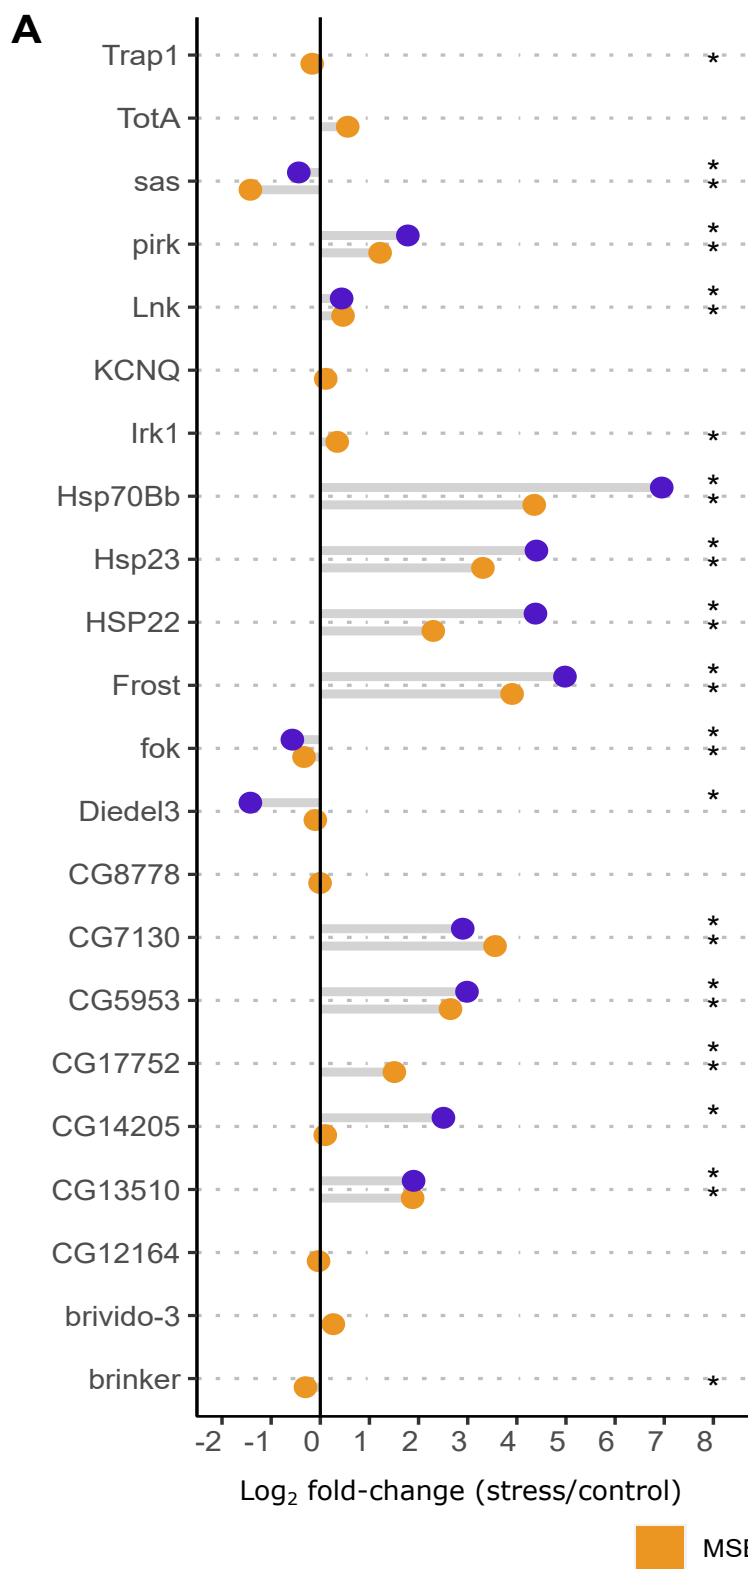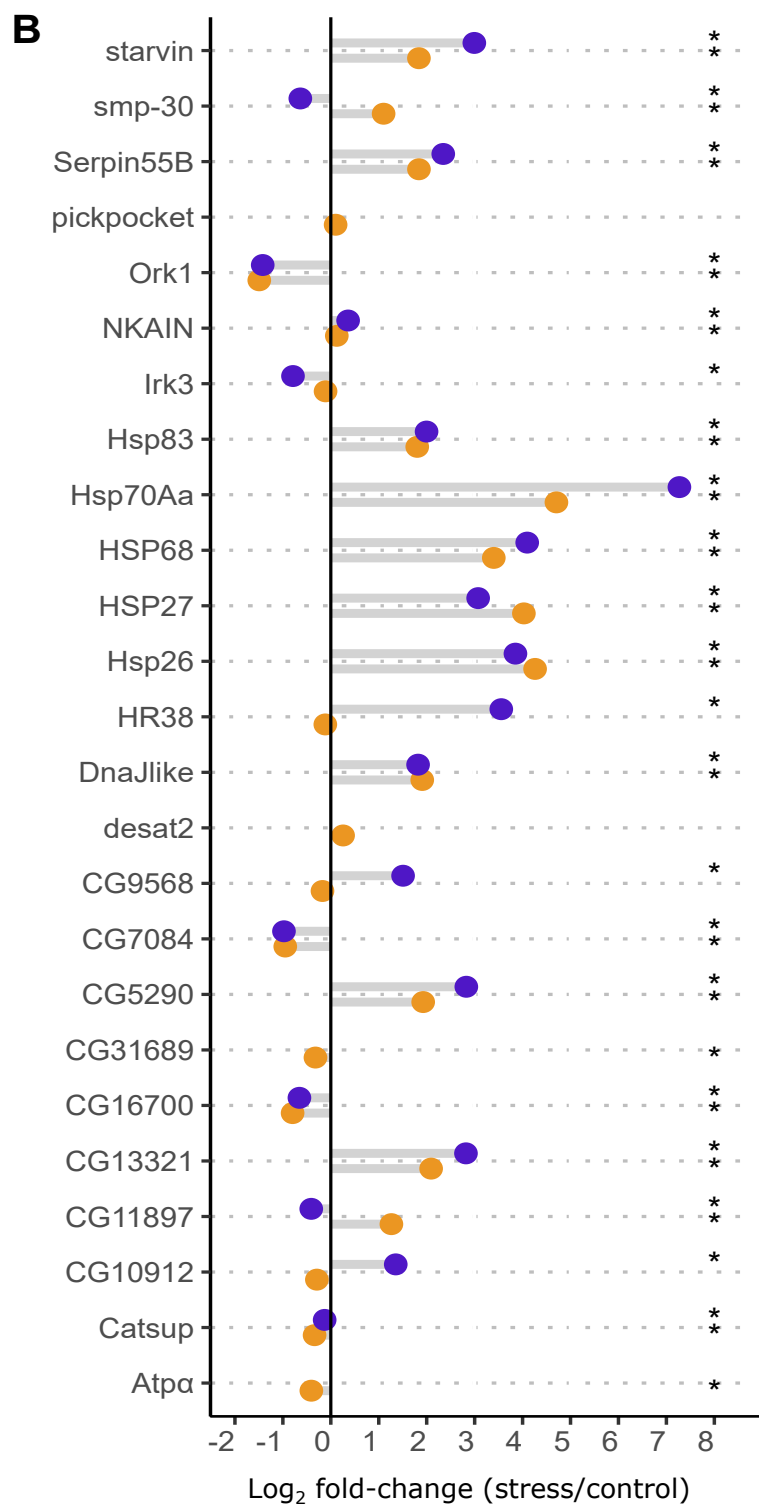

**Figure S5.** Comparisons of Log<sub>2</sub> fold-change (stress/control) in MSB oxidative stress (orange) and cold shock (von Heckel et al. 2016) (purple) experiments of (A) 22 viable and (B) not viable/malformed candidate genes identified by von Heckel et al. (2016) for RNAi knockdown. Asterisk indicates the adjusted *P*-value from a Wald test as applied in DESeq2: \**P* < 0.05.



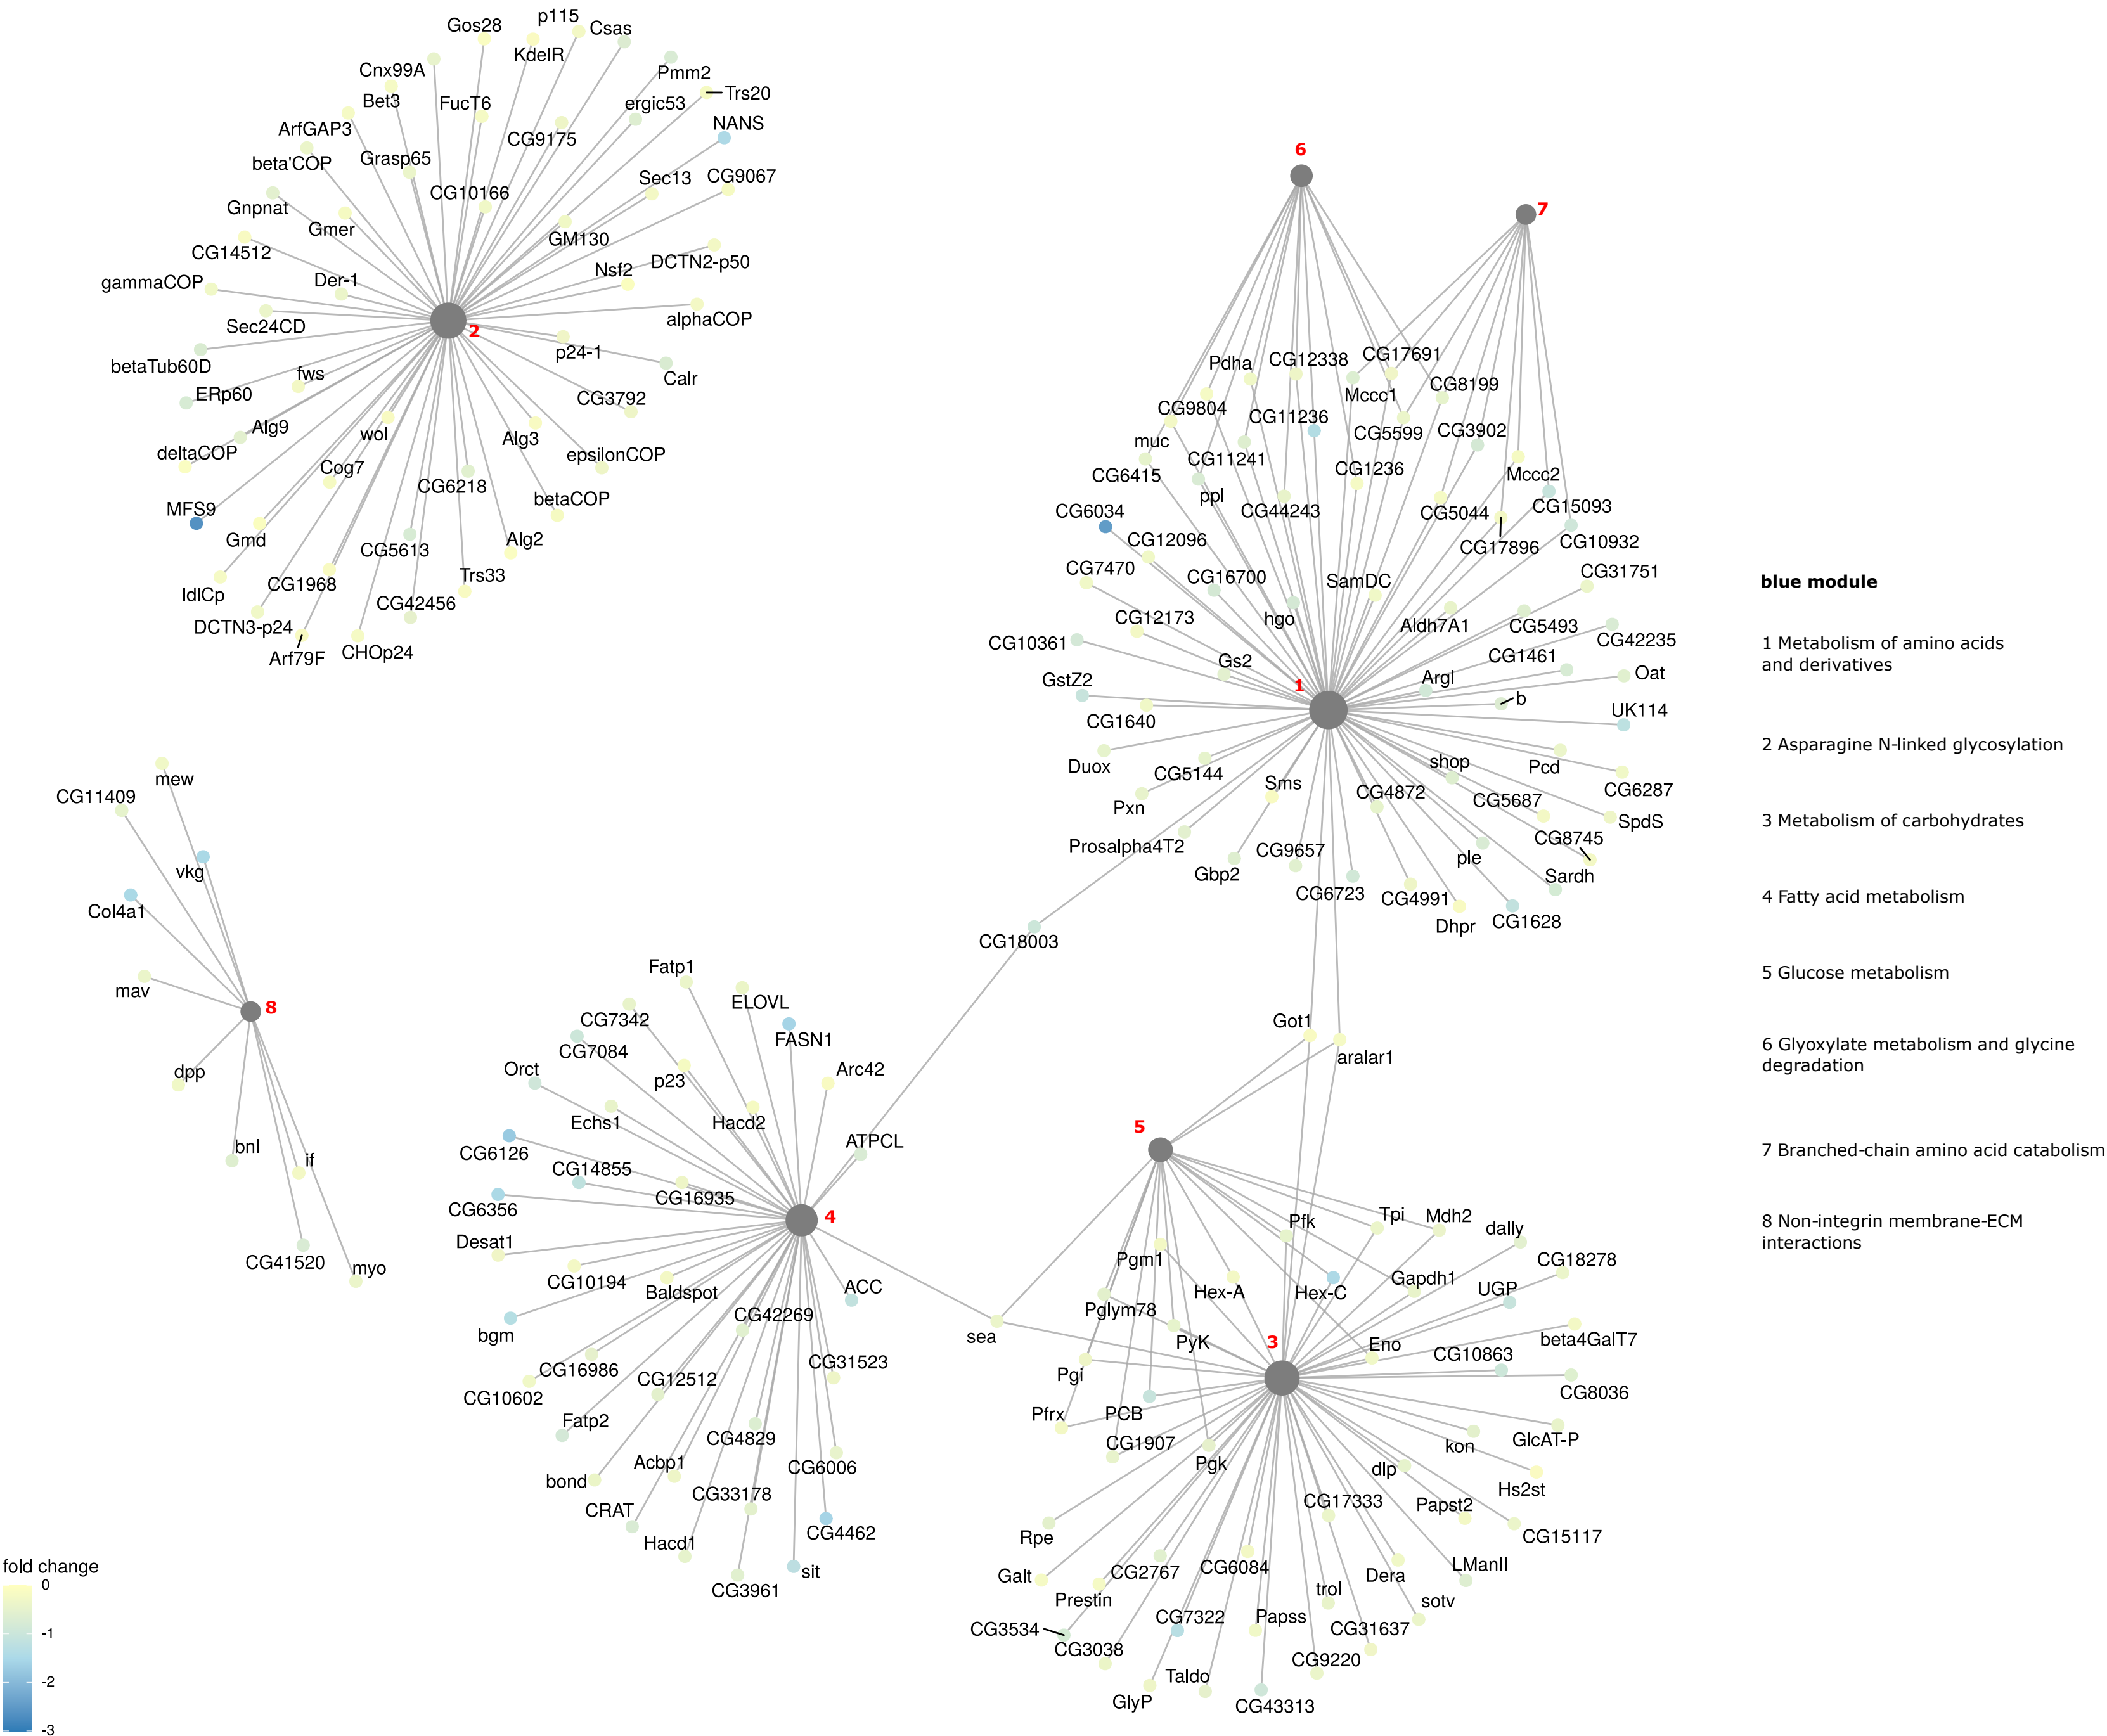



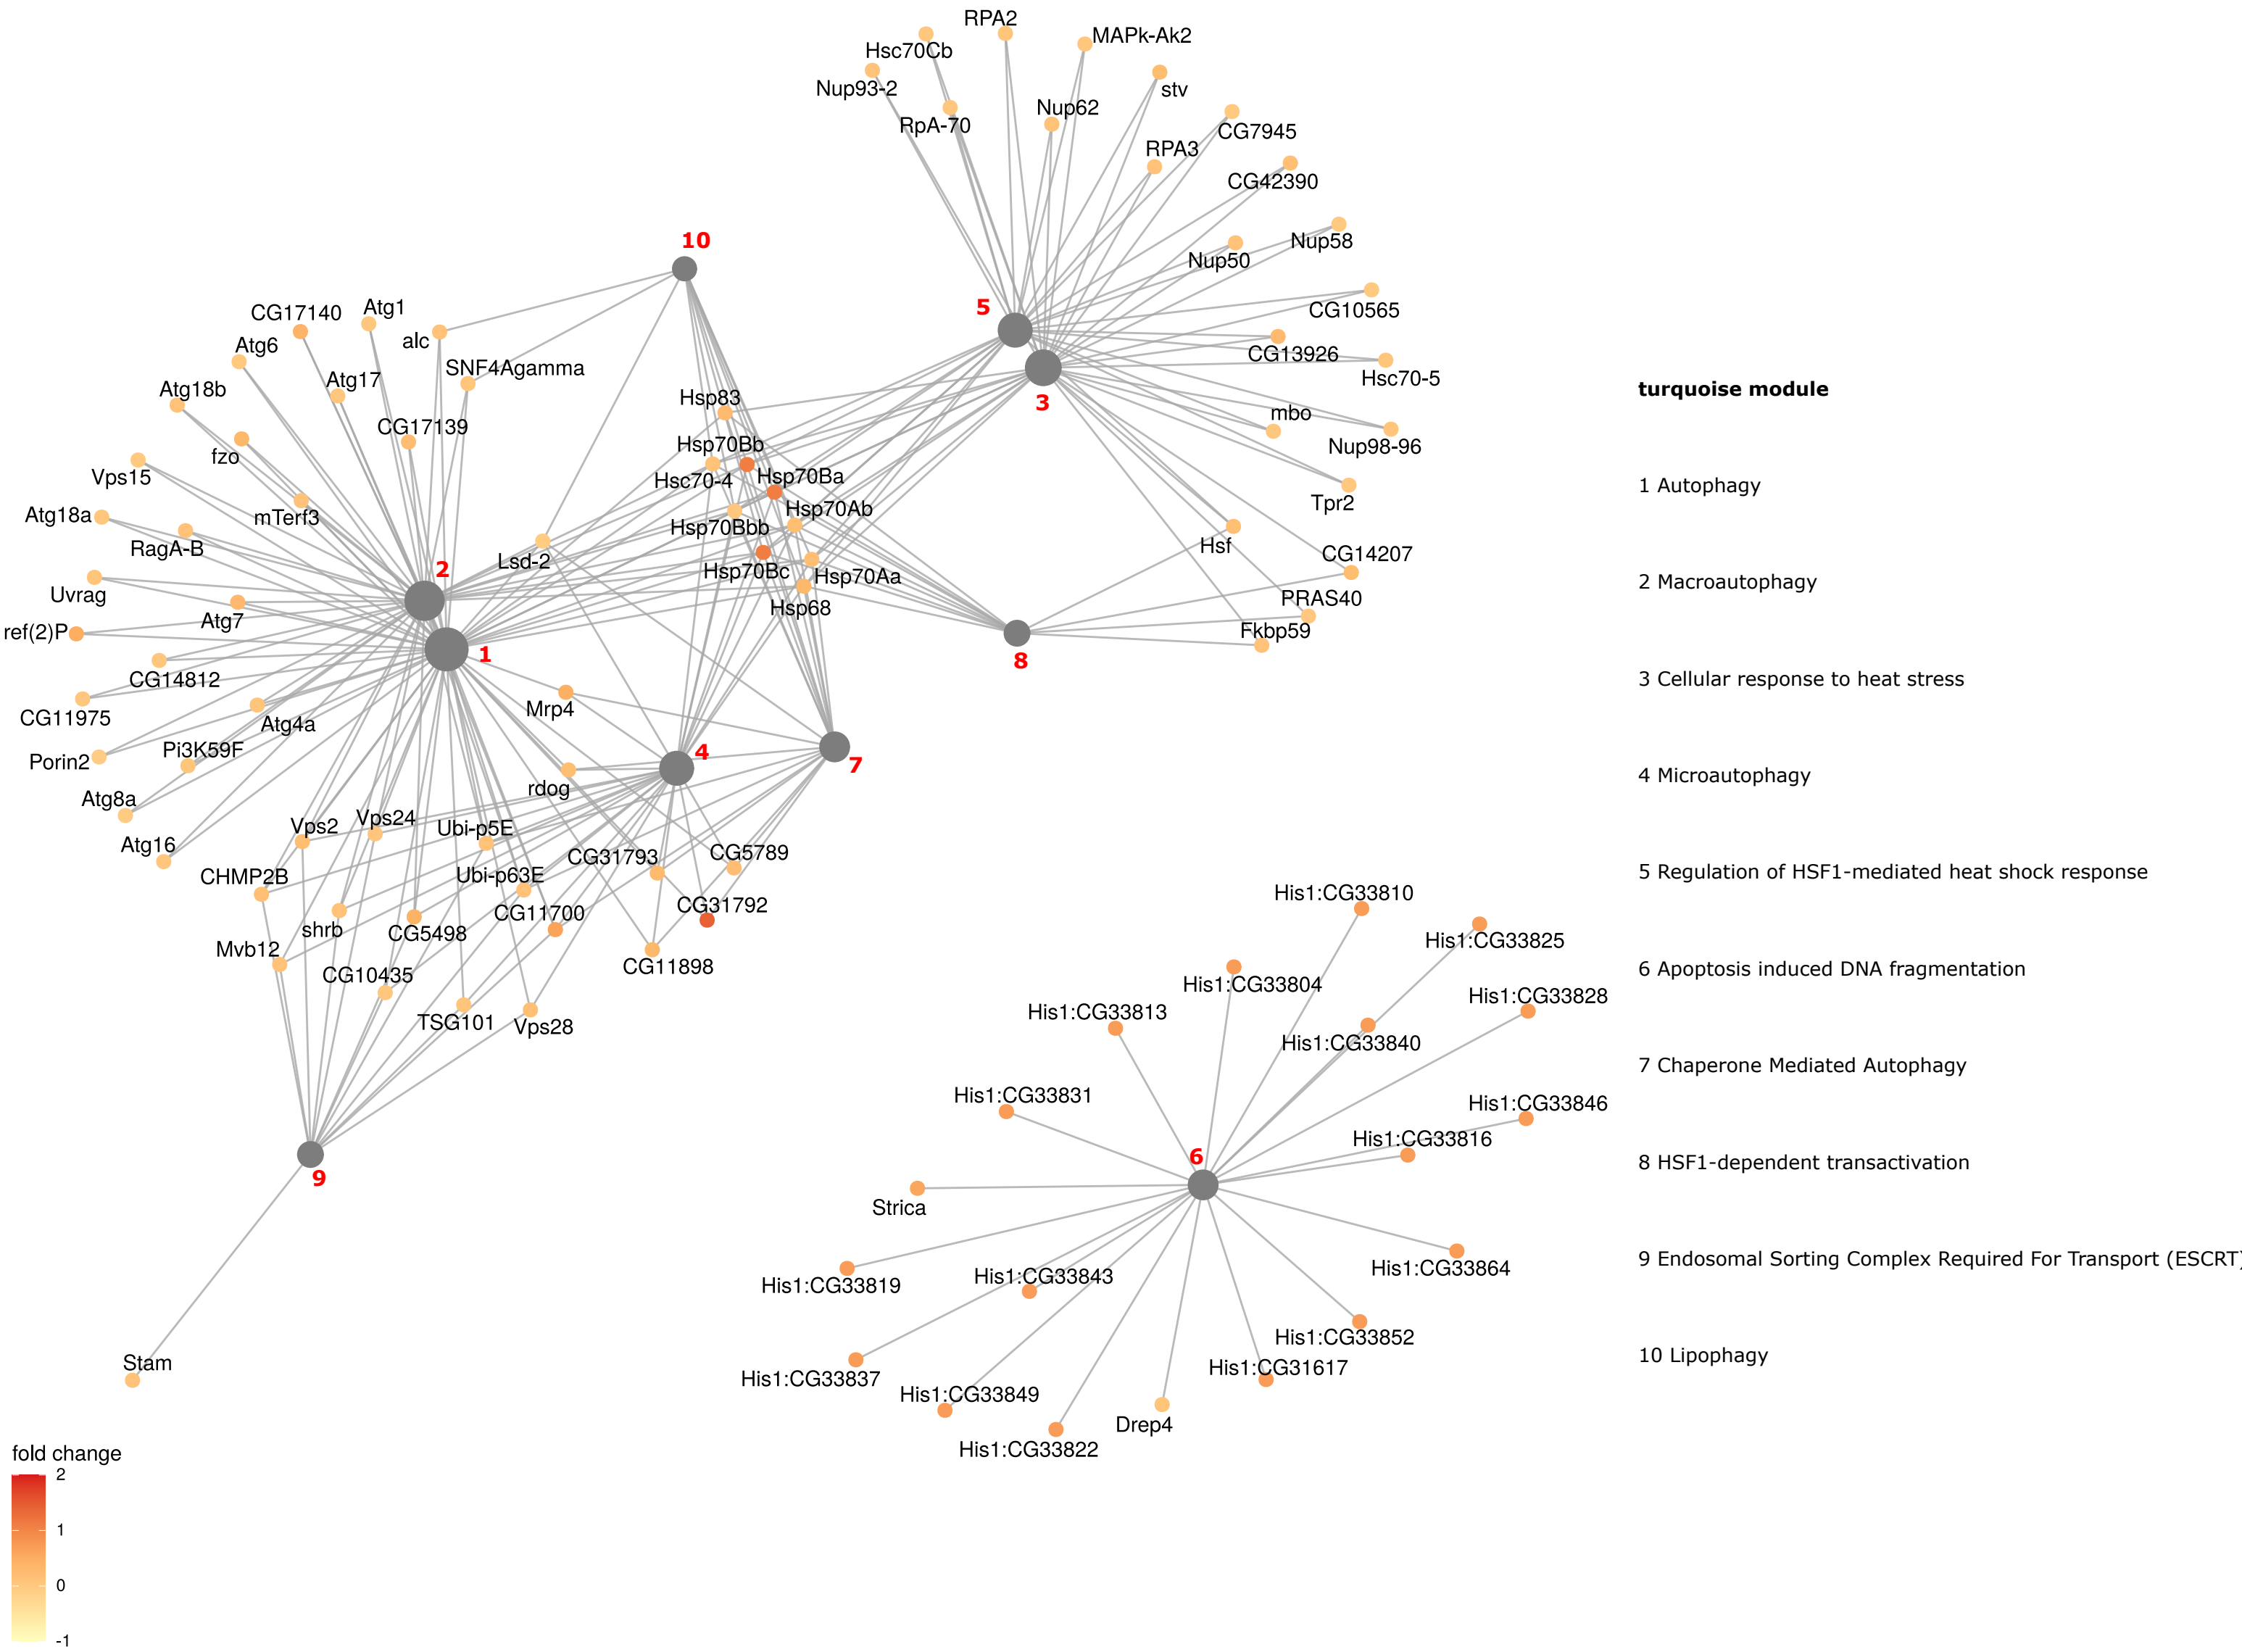

**Figure S7A.** The 10 reactome pathways that show the highest enrichment for genes under oxidative stress in the deletion background relative to non-deletion from the WGCNA's turquoise module are shown.



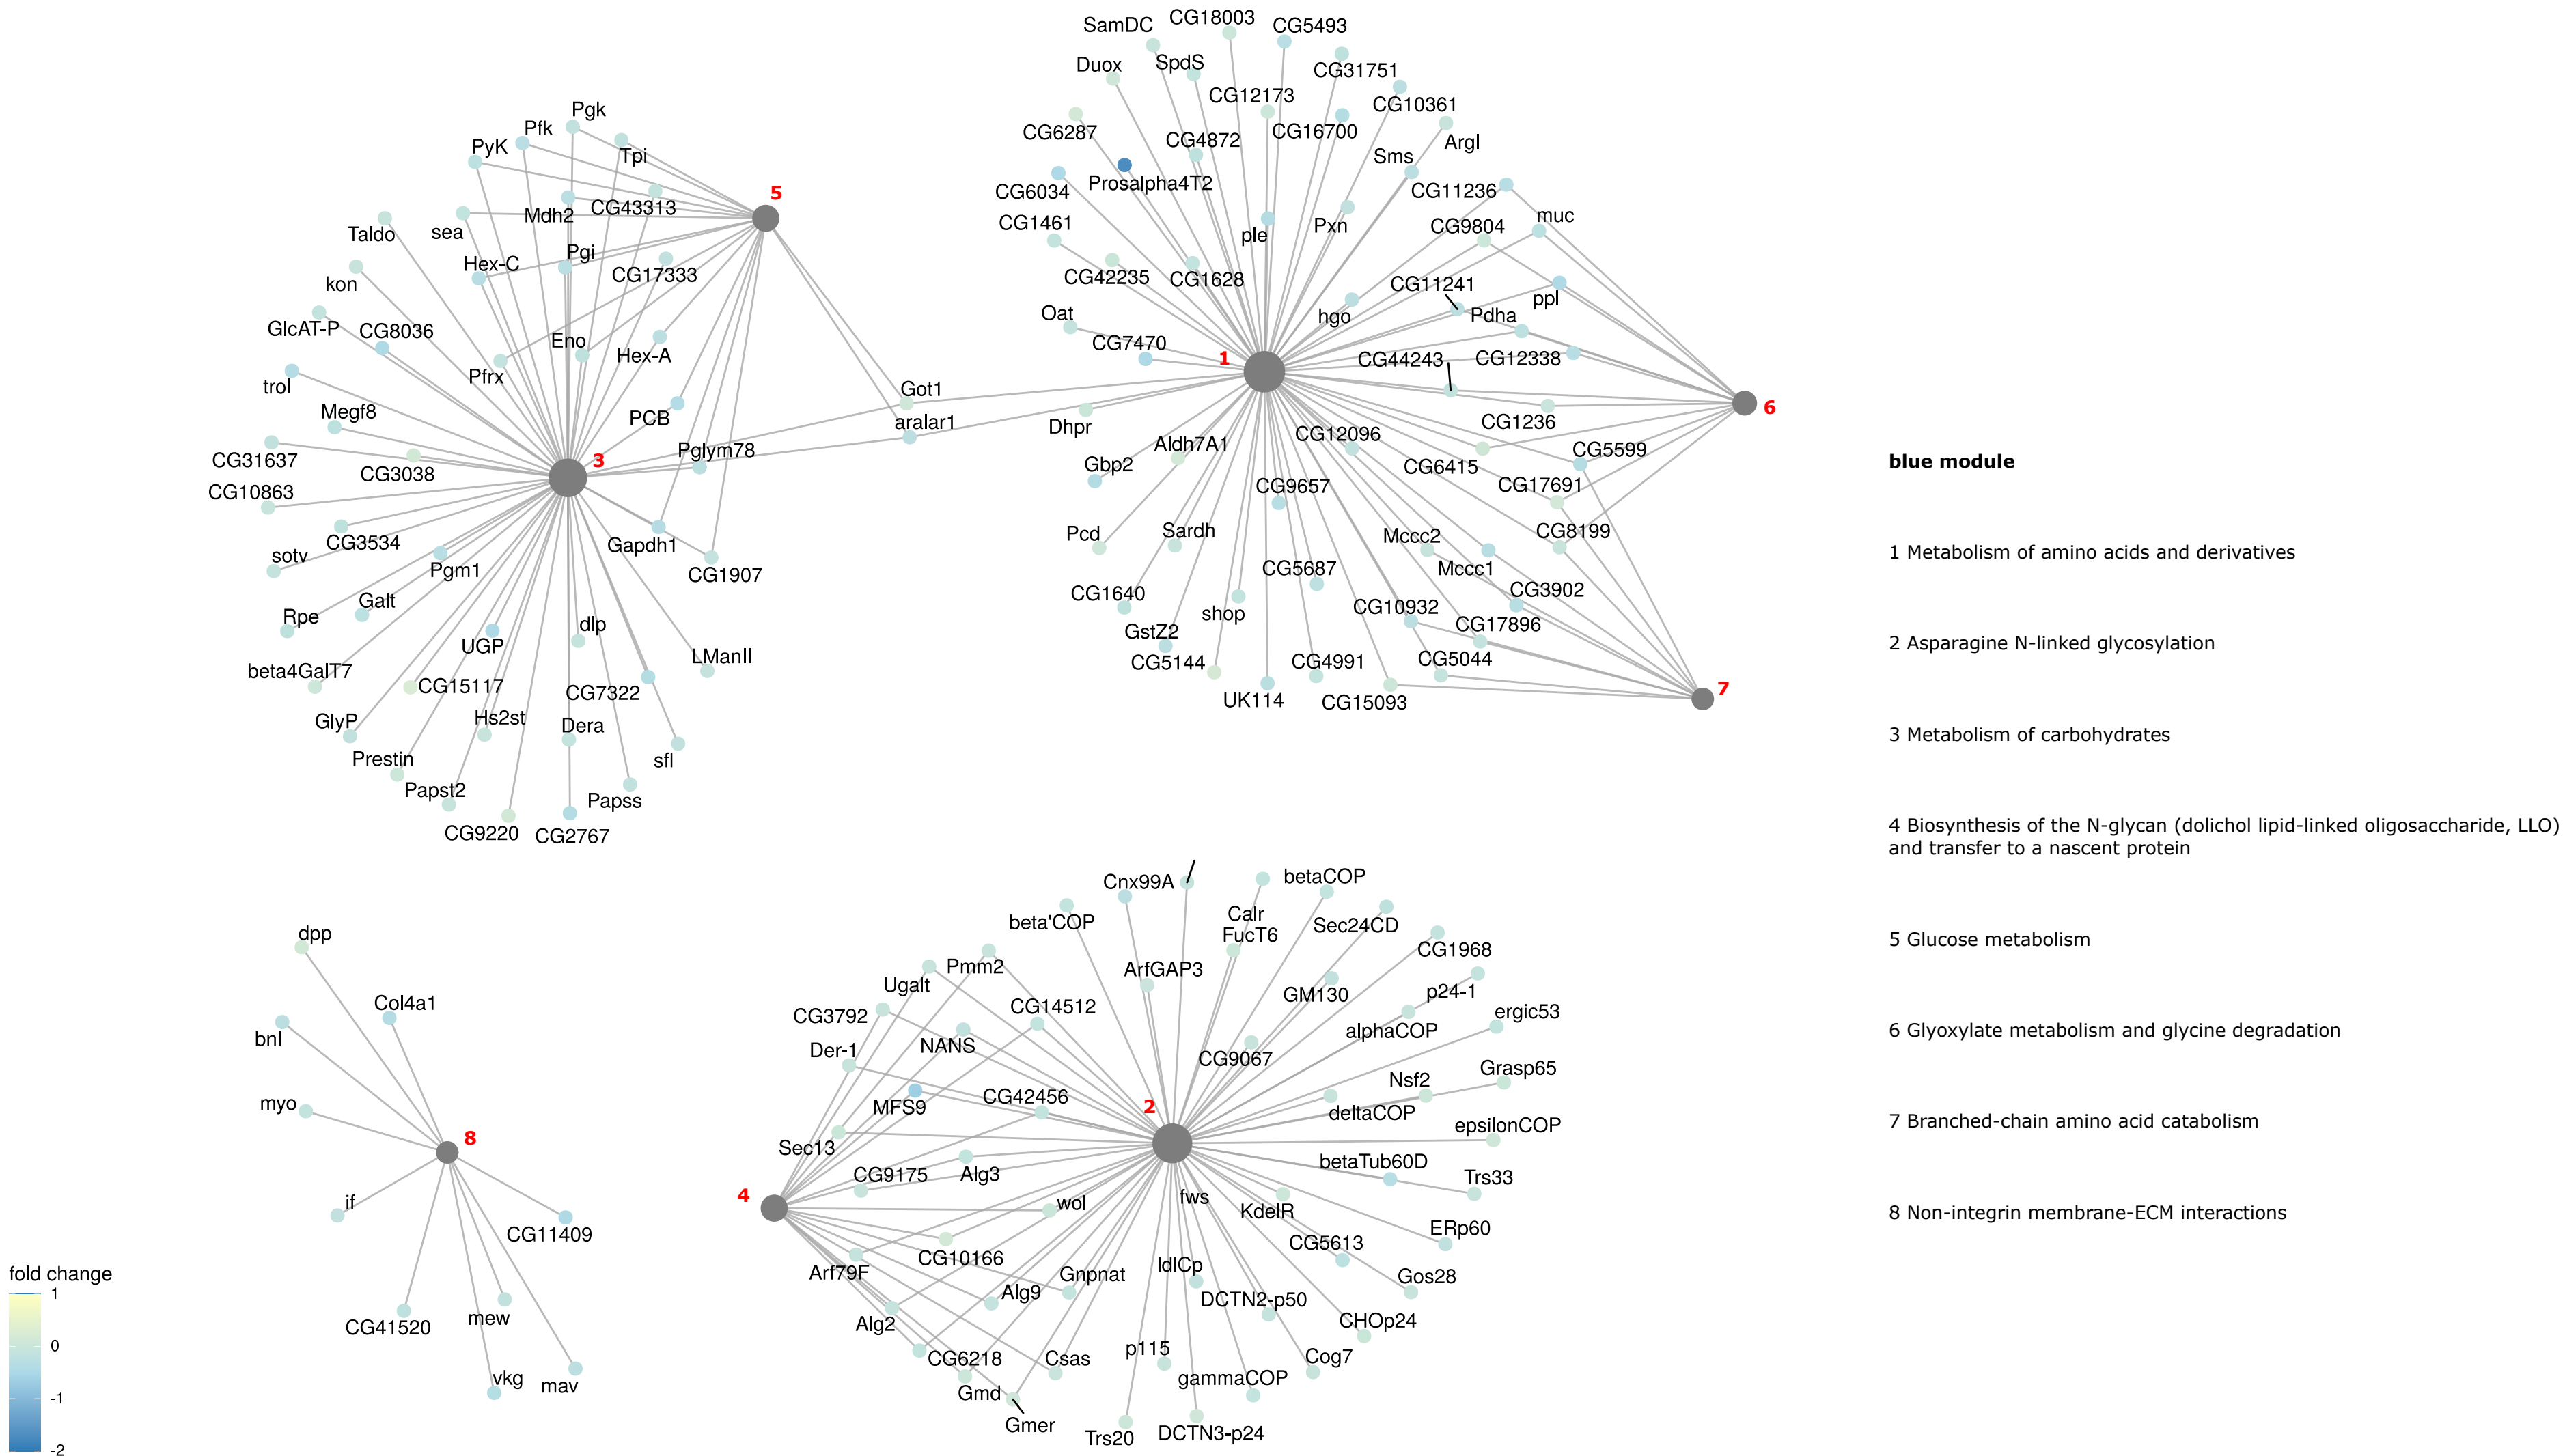

**Figure S7B.** The 8 reactome pathways that show the highest enrichment for genes under oxidative stress in the deletion background relative to non-deletion from the WGCNA's blue module are shown.
